# Supplementary material for: Insights into the Variation in Bioactivities of Closely Related Streptomyces Strains from Marine Sediments of the Visayan Sea against ESKAPE and Ovarian Cancer
Source: MDPI journal article supplement (doi:10.3390/md19080441), 2021-07-31
Supplement: s1 [file s1]

# Insights into the Variation in Bioactivities of Closely Related *Streptomyces* Strains from Marine Sediments of the Visayan Sea against ESKAPE and Ovarian Cancer

Edna M. Sabido<sup>1</sup>, Chuckcris P. Tenebro<sup>2</sup>, Dana Joanne Von L. Trono<sup>2</sup>, Carmela Vannette B. Vicera<sup>2</sup>, Sheeny Fane L. Leonida<sup>1</sup>, Jose Jeffrey Wayne B. Maybay<sup>1</sup>, Rikka Reyes-Salarda<sup>2,3</sup>, Diana S. Amago<sup>1</sup>, Angelica Marie V. Aguadera<sup>1</sup>, May C. Octaviano<sup>1</sup>, Jonel P. Saludes<sup>1,4,5,6\*</sup> and Doralyn S. Dalisay<sup>2,3,5,6\*</sup>

<sup>1</sup> Center for Natural Drug Discovery and Development (CND3), University of San Agustin, Iloilo City 5000, Philippines; ednasabido@usa.edu.ph (E.M.S.); sfleonida@usa.edu.ph (S.F.L.L.); jjmaybay@usa.edu.ph (J.J.W.B.M.); damago@usa.edu.ph (D.S.A.); aaguadera@usa.edu.ph (A.M.V.A.); moctaviano@usa.edu.ph (M.C.O.)

<sup>2</sup> Center for Chemical Biology and Biotechnology (C2B2), University of San Agustin, Iloilo City 5000, Philippines; ctenebro@usa.edu.ph (C.P.T.); djvtrono@usa.edu.ph (D.J.V.L.T.); cvicera@usa.edu.ph (C.V.B.V.)

<sup>3</sup> Department of Biology, College of Liberal Arts, Sciences, and Education, University of San Agustin, Iloilo City 5000, Philippines; rikkareyes@usa.edu.ph (R.R.S.)

<sup>4</sup> Department of Chemistry, College of Liberal Arts, Sciences, and Education, University of San Agustin, Iloilo City 5000, Philippines; jpsaludes@usa.edu.ph (J.P.S.)

<sup>5</sup> Tuklas Lunas Development Center, University of San Agustin, Iloilo City 5000, Philippines

<sup>6</sup> Balik Scientist Program, Philippine Council for Health Research and Development (PCHRD), Department of Science and Technology, Bicutan, Taguig City 1631, Philippines

\* Correspondence: jsaludes@usa.edu.ph (J.P.S.); ddalisay@usa.edu.ph (D.S.D.) ; Tel.: +63 33 501-0350

## Supplemental Information

**Table S1.** Growth of *Streptomyces* isolates in different NaCl concentrations.

| Isolates            |                      | Observations                     |                                               |                                               |                                   |                                   |                                                |
|---------------------|----------------------|----------------------------------|-----------------------------------------------|-----------------------------------------------|-----------------------------------|-----------------------------------|------------------------------------------------|
|                     |                      | 0%                               | 3%                                            | 5%                                            | 7%                                | 10%                               | 12%                                            |
| DSD004 <sup>T</sup> | Growth               | +++                              | +++                                           | +++                                           | ++                                | +                                 | +                                              |
|                     | Mycelium Description | mass of gray spores              | mass of gray spores                           | mass of gray spores                           | no spores                         | no spores, yellow brown substrate | no spores, yellow brown substrate              |
|                     | Diffused Pigment     | reddish brown                    | reddish brown                                 | reddish brown                                 | reddish brown                     | none                              | none                                           |
| DSD006 <sup>T</sup> | Growth               | +++                              | +++                                           | +++                                           | +++                               | ++                                | +                                              |
|                     | Mycelium Description | mass of white spores             | mass of white spores                          | mass of white spores                          | mass of white spores              | mass of white spores              | few white spores, light yellow brown substrate |
|                     | Diffused Pigment     | none                             | none                                          | none                                          | none                              | none                              | none                                           |
| DSD011 <sup>T</sup> | Growth               | +++                              | +++                                           | +++                                           | ++                                | -                                 | -                                              |
|                     | Mycelium Description | mass of grayish spores           | mass of grayish spores                        | mass of grayish spores                        | no spores, yellow brown substrate |                                   |                                                |
|                     | Diffused Pigment     | none                             | none                                          | none                                          | none                              |                                   |                                                |
| DSD012 <sup>T</sup> | Growth               | +++                              | +++                                           | +++                                           | ++                                | -                                 | -                                              |
|                     | Mycelium Description | mass of grayish and white spores | white and gray spores, yellow brown substrate | white and gray spores, yellow brown substrate | no spores, yellow brown substrate |                                   |                                                |
|                     | Diffused Pigment     | none                             | none                                          | none                                          | none                              |                                   |                                                |
| DSD015 <sup>T</sup> | Growth               | +++                              | +++                                           | +++                                           | ++                                | +                                 | -                                              |
|                     | Mycelium Description | mass of gray spores              | white and gray spores, yellow brown substrate | white and gray spores, yellow brown substrate | no spores, yellow brown substrate | no spores, yellow brown substrate |                                                |
|                     | Diffused Pigment     | none                             | *blue violet                                  | *blue violet                                  | none                              | none                              |                                                |
| DSD016 <sup>T</sup> | Growth               | +++                              | +++                                           | +++                                           | ++                                | ++                                | -                                              |
|                     | Mycelium Description | mass of gray and white spores    | gray and white spores, yellow brown substrate | gray and white spores, yellow brown substrate | no spores, yellow brown substrate | no spores, yellow brown substrate |                                                |

| Isolates            |                      | Observations                  |                               |                                      |                                      |                                            |     |
|---------------------|----------------------|-------------------------------|-------------------------------|--------------------------------------|--------------------------------------|--------------------------------------------|-----|
|                     |                      | 0%                            | 3%                            | 5%                                   | 7%                                   | 10%                                        | 12% |
|                     | Diffused Pigment     | none                          | none                          | none                                 | none                                 | none                                       |     |
|                     | Growth               | +++                           | +++                           | +++                                  | ++                                   | +                                          | -   |
| DSD017 <sup>T</sup> | Mycelium Description | mass of gray spores           | mass of gray and white spores | mass of gray spores                  | no spores, yellow brown substrate    | no spores, yellow brown substrate          |     |
|                     | Diffused Pigment     | none                          | red orange                    | red orange                           | yellow orange                        | none                                       |     |
|                     | Growth               | +++                           | +++                           | +++                                  | +++                                  | ++                                         | -   |
| DSD035 <sup>T</sup> | Mycelium Description | mass of gray spores           | mass of gray spores           | gray and white spores                | white spores, yellow brown substrate | no spores, yellow brown substrate          |     |
|                     | Diffused Pigment     | none                          | none                          | yellow                               | yellow                               | light yellow                               |     |
|                     | Growth               | +++                           | ++                            | ++                                   | ++                                   | -                                          | -   |
| DSD036 <sup>T</sup> | Mycelium Description | mass of gray spores           | no spores, brown substrate    | white spores, brown substrate        | no spores, brown substrate           |                                            |     |
|                     | Diffused Pigment     | none                          | none                          | none                                 | yellow                               |                                            |     |
|                     | Growth               | +++                           | +++                           | +++                                  | +++                                  | -                                          | -   |
| DSD037 <sup>T</sup> | Mycelium Description | mass of gray and white spores | mass of white spores          | mass of white spores                 | mass of white spores                 |                                            |     |
|                     | Diffused Pigment     | none                          | none                          | brown                                | none                                 |                                            |     |
|                     | Growth               | +++                           | ++                            | +++                                  | +++                                  | ++                                         | -   |
| DSD039 <sup>T</sup> | Mycelium Description | mass of gray spores           | white spores                  | white spores, yellow brown substrate | white spores, yellow brown substrate | no spores, yellow brown wrinkled substrate |     |
|                     | Diffused Pigment     | none                          | none                          | yellow                               | yellow                               | yellow                                     |     |
|                     | Growth               | +++                           | +++                           | +++                                  | ++                                   | -                                          | -   |
| DSD040 <sup>T</sup> | Mycelium Description | mass of gray and white spores | mass of gray and white spores | mass of gray and white spores        | mass of gray and white spores        |                                            |     |
|                     | Diffused Pigment     | none                          | none                          | none                                 | none                                 |                                            |     |
| DSD041 <sup>T</sup> | Growth               | +++                           | +++                           | +++                                  | ++                                   | -                                          | -   |

| Isolates            |                      | Observations                  |                               |                               |                               |     |     |
|---------------------|----------------------|-------------------------------|-------------------------------|-------------------------------|-------------------------------|-----|-----|
|                     |                      | 0%                            | 3%                            | 5%                            | 7%                            | 10% | 12% |
|                     | Mycelium Description | mass of gray and white spores |     |     |
|                     | Diffused Pigment     | none                          | none                          | none                          | none                          |     |     |
|                     | Growth               | +++                           | +++                           | +++                           | ++                            | -   | -   |
| DSD042 <sup>T</sup> | Mycelium Description | mass of gray and white spores | mass of gray and white spores | mass of gray spores           | mass of gray spores           |     |     |
|                     | Diffused Pigment     | none                          | none                          | none                          | none                          |     |     |
|                     | Growth               | +++                           | +++                           | +++                           | ++                            | -   | -   |
| DSD043 <sup>T</sup> | Mycelium Description | mass of gray and white spores | mass of gray and white spores | mass of gray spores           | mass of gray and white spores |     |     |
|                     | Diffused Pigment     | none                          | none                          | none                          | none                          |     |     |

\*Selected plates. The growth is indicated in the following condition: good (+++), moderate (++), poor (+), and no growth (-). The presence of mycelium and diffused pigments were also described in each isolate. No growth beyond 12% NaCl concentration.

**Table S2.** Minimum Inhibitory Concentrations of *Streptomyces* crude extracts against ESKAPE pathogens.

| Treatment/Isolates<br>code | MIC <sub>90</sub> (mg/mL) |                  |                      |                     |                      |                   |
|----------------------------|---------------------------|------------------|----------------------|---------------------|----------------------|-------------------|
|                            | <i>E. faecium</i>         | <i>S. aureus</i> | <i>K. pneumoniae</i> | <i>A. baumannii</i> | <i>P. aeruginosa</i> | <i>E. cloacae</i> |
|                            | ATCC<br>700221            | ATCC<br>BAA-44   | ATCC BAA-<br>1705    | ATCC BAA-<br>1605   | ATCC BAA-<br>1744    | ATCC<br>BAA-2341  |
| DSD004 <sup>T</sup>        | >2.5                      | 0.625            | >2.5                 | >2.5                | >2.5                 | >2.5              |
| DSD006 <sup>T</sup>        | 2.5                       | 0.312            | 10                   | 10                  | 10                   | 10                |
| DSD011 <sup>T</sup>        | >2.5                      | 0.312            | 20                   | 10                  | 10                   | 10                |
| DSD012 <sup>T</sup>        | >2.5                      | >2.5             | >20                  | >20                 | >20                  | >20               |
| DSD015 <sup>T</sup>        | >2.5                      | 2.5              | >20                  | >20                 | >20                  | >20               |
| DSD016 <sup>T</sup>        | >2.5                      | 0.625            | >20                  | >20                 | >20                  | >20               |
| DSD017 <sup>T</sup>        | >2.5                      | >2.5             | >20                  | >20                 | >20                  | >20               |
| DSD035 <sup>T</sup>        | >2.5                      | >2.5             | >2.5                 | >2.5                | >2.5                 | >2.5              |
| DSD036 <sup>T</sup>        | 2.5                       | >2.5             | >20                  | >20                 | >20                  | >20               |
| DSD037 <sup>T</sup>        | 1.25                      | 2.5              | 20                   | 10                  | >20                  | >20               |

| Treatment/Isolates<br>code | MIC <sub>90</sub> (mg/mL) |                  |                      |                     |                      |                   |
|----------------------------|---------------------------|------------------|----------------------|---------------------|----------------------|-------------------|
|                            | <i>E. faecium</i>         | <i>S. aureus</i> | <i>K. pneumoniae</i> | <i>A. baumannii</i> | <i>P. aeruginosa</i> | <i>E. cloacae</i> |
|                            | ATCC                      | ATCC             | ATCC BAA-            | ATCC BAA-           | ATCC BAA-            | ATCC              |
|                            | 700221                    | BAA-44           | 1705                 | 1605                | 1744                 | BAA-2341          |
| DSD039 <sup>T</sup>        | >2.5                      | >2.5             | >20                  | >20                 | >20                  | >20               |
| DSD040 <sup>T</sup>        | >2.5                      | >2.5             | 20                   | >20                 | >20                  | >20               |
| DSD041 <sup>T</sup>        | >2.5                      | >2.5             | 20                   | 20                  | 20                   | 20                |
| DSD042 <sup>T</sup>        | >2.5                      | >2.5             | 20                   | 10                  | 10                   | 20                |
| DSD043 <sup>T</sup>        | >2.5                      | >2.5             | >20                  | 20                  | >20                  | >20               |
| Ampicillin                 |                           |                  |                      |                     |                      | >0.512            |
| Gentamicin                 |                           |                  |                      | 0.128               | 0.001                |                   |
| Tetracycline               | 0.001                     | 0.016            | 0.001                | 0.032               | 0.008                | 0.008             |
| Vancomycin                 | >0.512                    | 0.002            | 0.512                |                     |                      |                   |

Note: Ampicillin was only tested against *E. cloacae*; Gentamicin was only tested against *A. baumannii* and *P. aeruginosa*; Vancomycin was only tested against *E. faecium*, *S. aureus* and *K. pneumoniae*. "T" – type strain

**Table S3.** Gel Permeation Chromatography (GPC) Purification of DSD042<sup>T</sup> crude extract showing four major fractions, color profile, and yield.

| Sample/Fraction | Fraction | Visible Color Profile | Yield (mg) |
|-----------------|----------|-----------------------|------------|
| <b>G1</b>       | 1-65     | Dark brown            | 1,437.2    |
| <b>G2</b>       | 66-95    | Reddish Brown         | 2,561.31   |
| <b>G3</b>       | 96-150   | Dark Brown            | 851.92     |
| <b>G4</b>       | 151-470  | Brownish Yellow       | 325.09     |

**Table S4.** Primers for amplification of 16S rRNA Gene.

| Gene        | Primers | Primer Sequence (5' to 3') |
|-------------|---------|----------------------------|
| 16S<br>rRNA | 27F     | AGAGTTTGATCCTGGCTCAG       |
|             | 1492R   | TACGGCTACCTTGTTACGACTT     |
|             | 518F    | CCAGCAGCCGCGGTAATACG       |
|             | 800R    | TACCAGGGTATCTAATCC         |

**Table S5.** Degenerate Primers for PCR Screening of Polyketide Synthase and Non-Ribosomal Synthase (References: 10, 28, 93-95).

| Target Gene for Amplification                           | Length (bp) | Primer Name | Primer Sequence (5' to 3')     |
|---------------------------------------------------------|-------------|-------------|--------------------------------|
| PKS-I $\beta$ -ketoacyl synthase (KS) domains fragments | 670         | KS-F        | CCS CAG SAG CGC STS YTS CTS GA |
|                                                         |             | KS-R        | GTS CCS GTS CCG TGS GYS TCS A  |
| PKS-I KS Domain Fragments                               | 700         | KSMAF       | TSG CSA TGG ACC CSC AGC AG     |
|                                                         |             | KSMBR       | CCS GTS CCG TGS GCC TCS AC     |
| PKS-II KS $\alpha$ and KS $\beta$ domain fragments      | 800-900     | KS $\alpha$ | TSG RCT ACR TCA ACG GSC ACG G  |
|                                                         |             | KS $\beta$  | TAC SAG TCS WTC GCC TGG TTC    |
| PKS-II KS $\alpha$ domain fragments                     | 613         | KS1-F       | TSG CST GCT TGG AYG CSA TC     |
|                                                         |             | KS1-R       | TGG AAN CCG CCG AAB CCT CT     |
| PKS-II at 5' portion of KS $\alpha$ genes               | 554         | 540F        | GGI TGC ACS TCI GGI MTS GAC    |
|                                                         |             | 1100R       | CCG ATS GCI CCS AGI GAG TG     |
| NRPS Adenylation domain (AD) fragments                  | 700         | A3F         | GCS TAC SYS ATS TAC ACS TCS GG |
|                                                         |             | A7R         | SAS GTC VCC SGT SCG GTA S      |

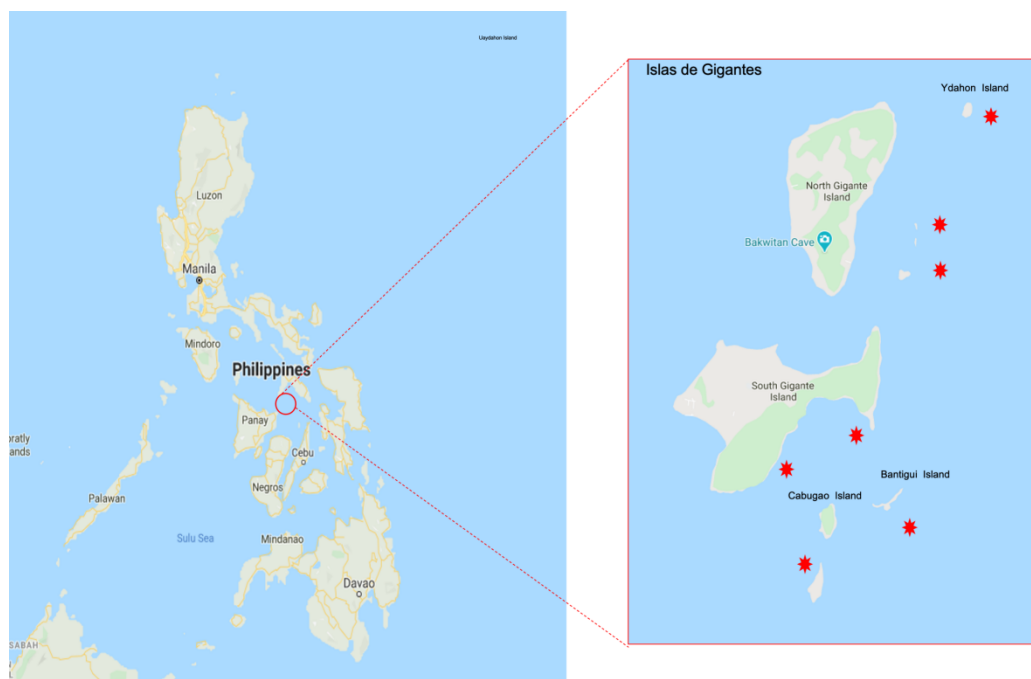

**Figure S1.** Map of the collection sites (shown in red) of marine sediments in the Islas de Gigantes group of islands.

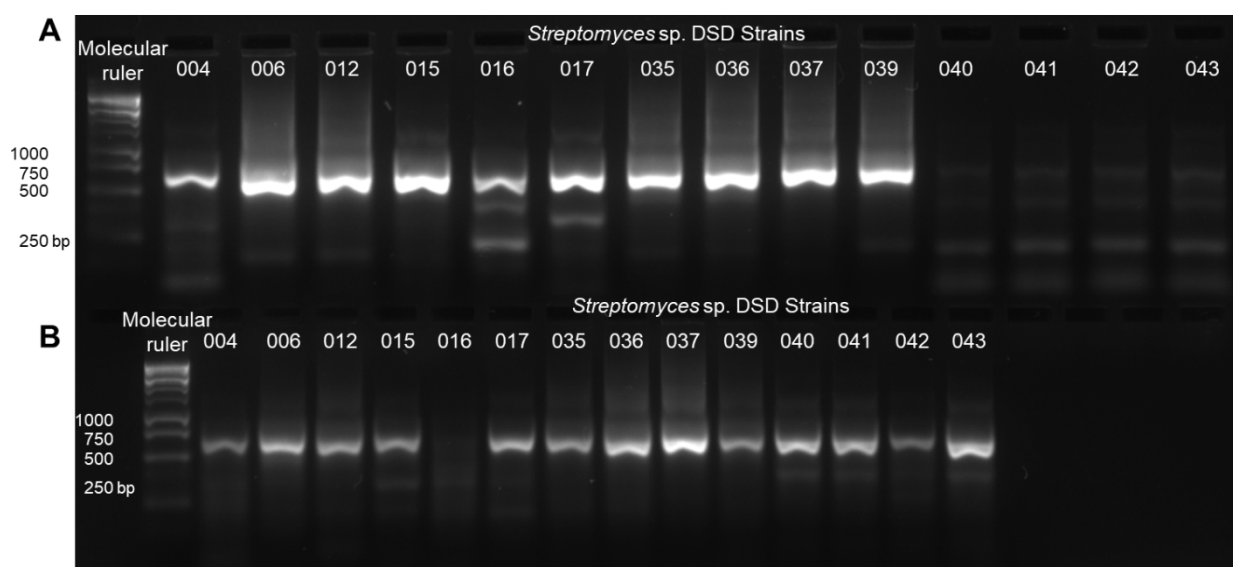

**Figure S2.** Agarose gel electrophoresis of the PKS-I amplicons of *Streptomyces* sp. strains. Two sets of primers were used to amplify the  $\beta$ -ketoacyl synthetase domain of PKS-I. Fragments of 600-700 bp of PKS-I amplified by A) KSMF and KSMR; and B) KSF and KSR primers.

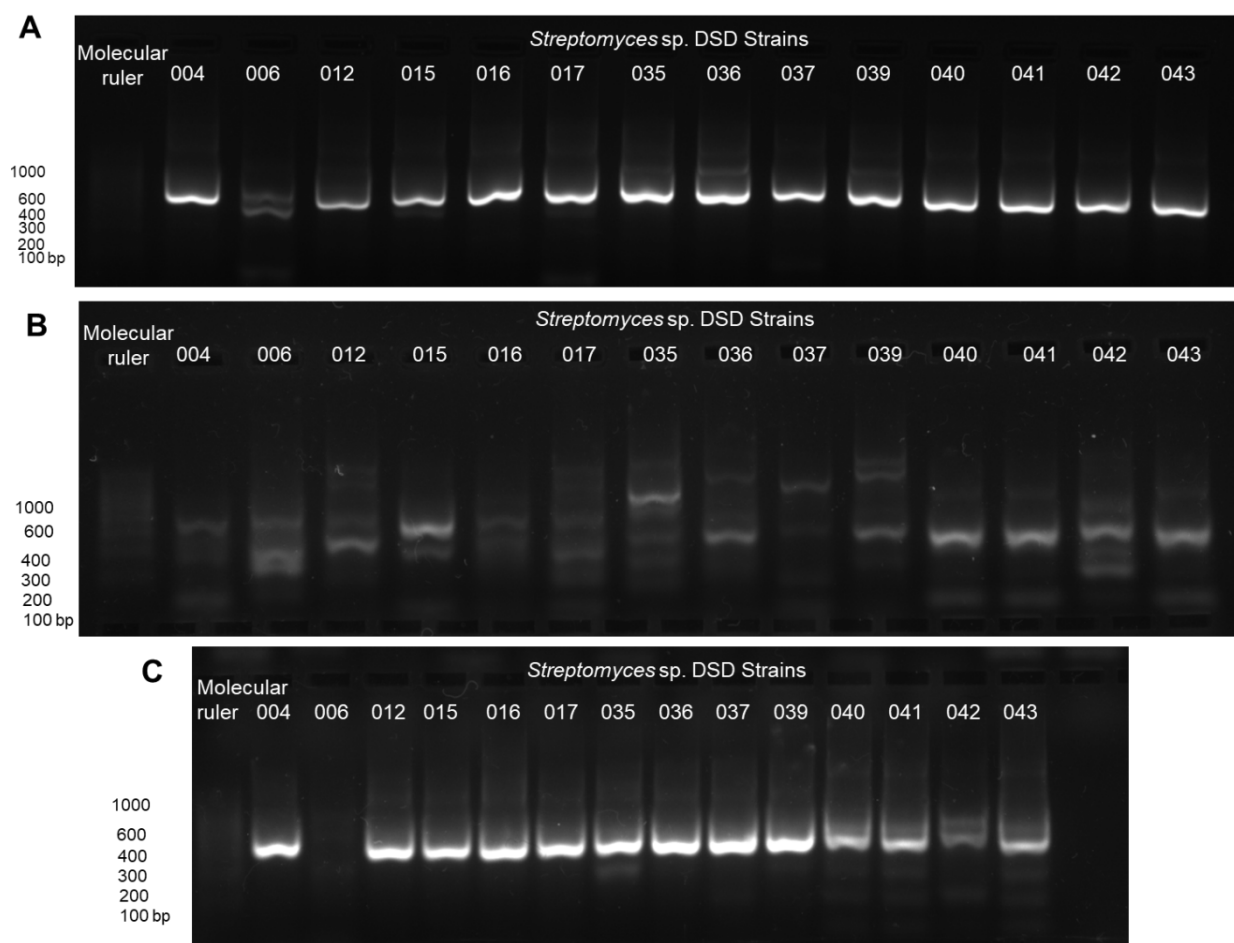

**Figure S3.** Agarose gel electrophoresis of the PKS-II amplicons of *Streptomyces* sp. strains. Three sets of primers were used to amplify the  $\beta$ -ketoacyl synthetase domain of PKS-II. A) KS1F and KS1R primers; B) KS $\alpha$  and KS $\beta$ ; and C) 540F and 1100R.

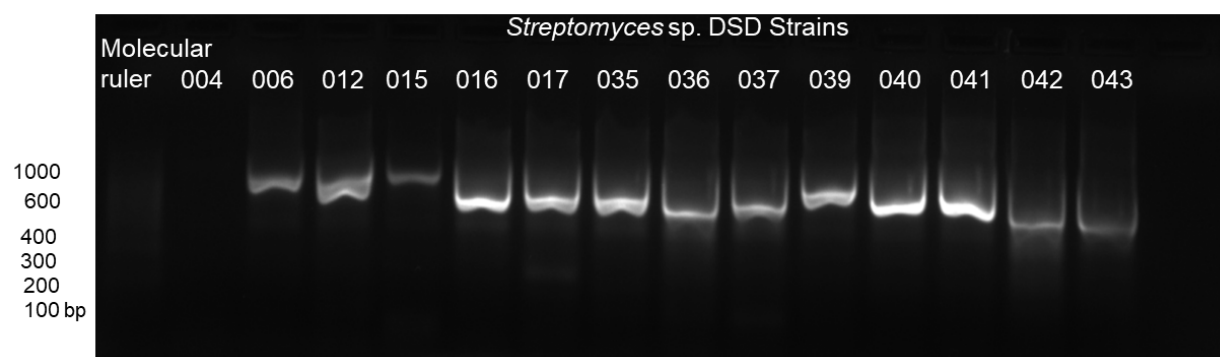

**Figure S4.** Agarose gel electrophoresis of the NRPS amplicons of *Streptomyces* sp. strains. A3F and A7R were the primers used to amplify the adenylation domain of NRPS.



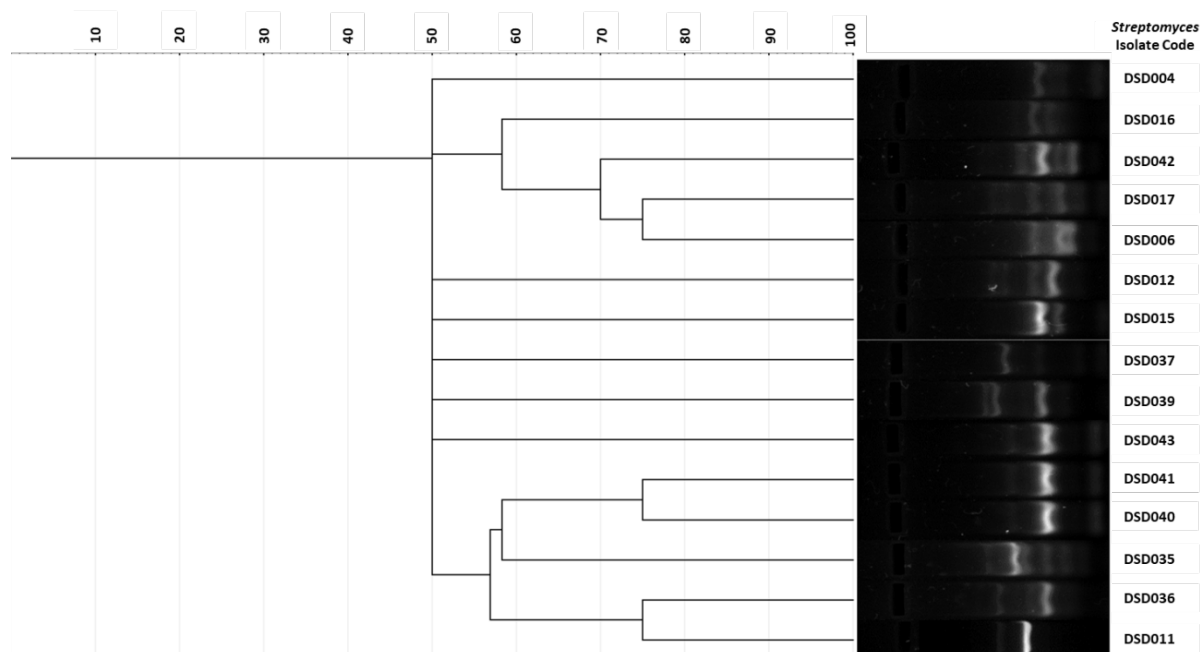

**Figure S5.** Dendrogram of Amplified Gene Fragments in *Streptomyces* isolates using KS $\alpha$ -KS $\beta$  primer set. The UPGMA clustering produced two main groups and eight clusters using the Dice coefficient. Band patterns observed may indicate the diverse aromatic compounds produced by the strains using PKS type-II machinery. The dendrogram was analyzed and generated using the Java program GelJ (Heras, J., Domínguez, C., Mata, E. *et al.* GelJ – a tool for analyzing DNA fingerprint gel images. *BMC Bioinformatics* **2015**, 16, 270).

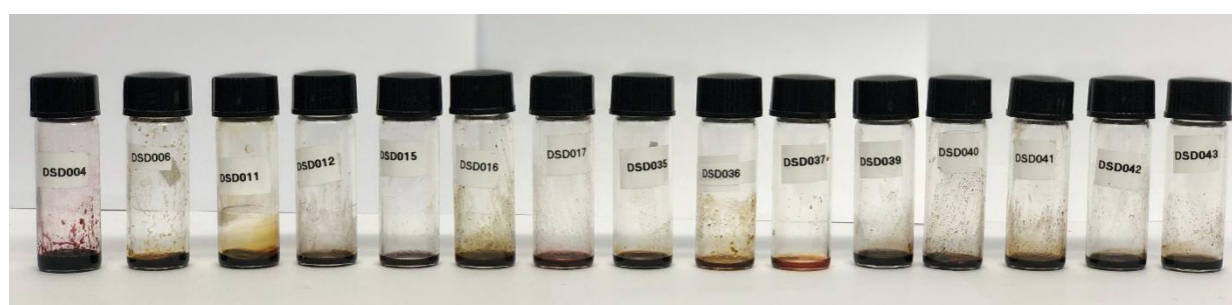

**Figure S6.** The 15 DSD isolate dried extracts of Islas de Gigantes extracted using ethyl acetate.

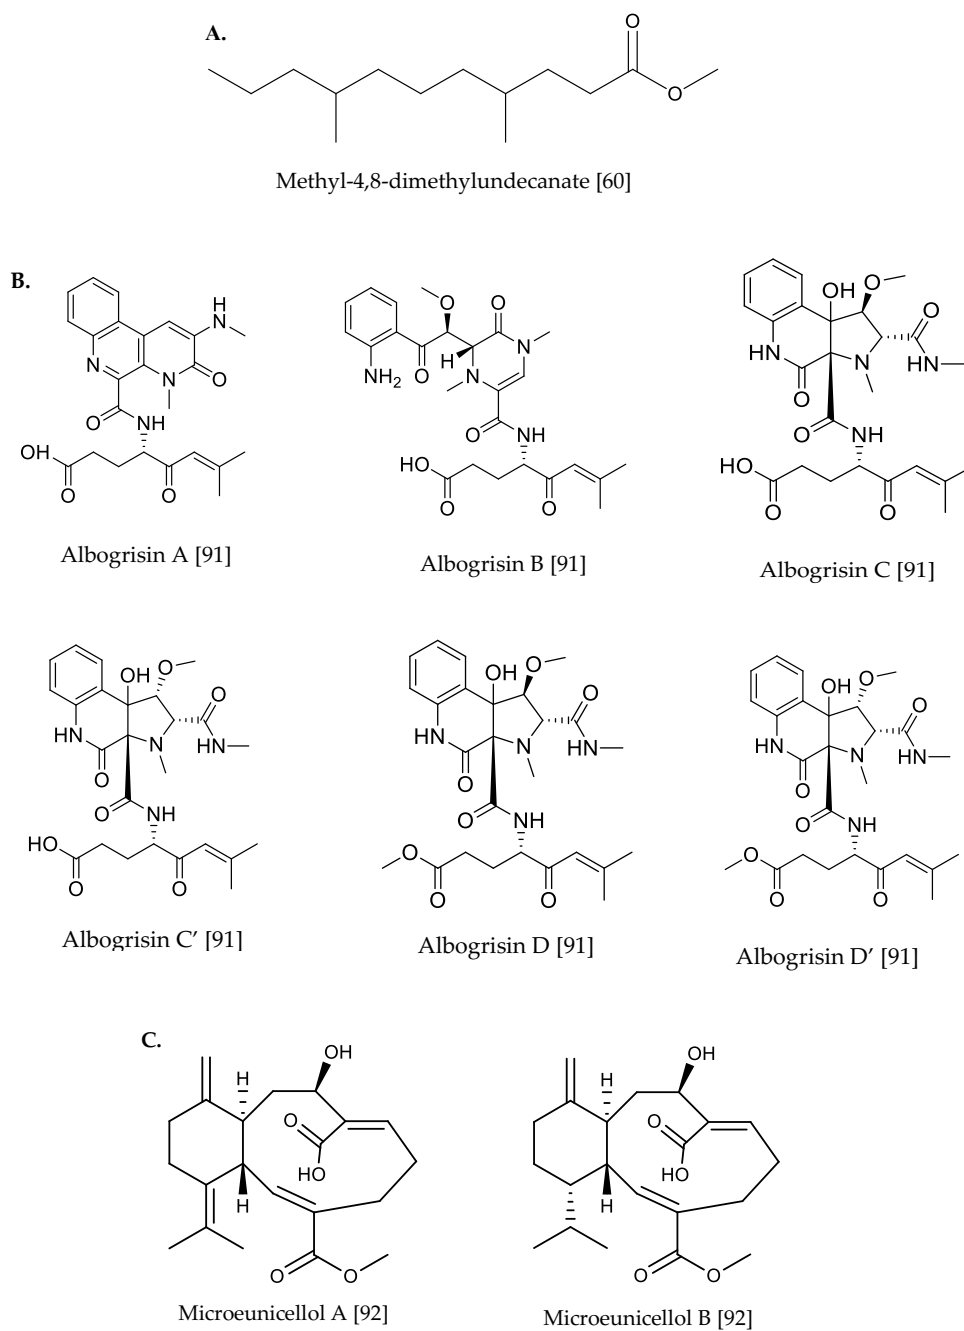

**Figure S7.** Molecular structure of compounds produced by *Streptomyces* strain related to *S. albogriseolus* (Reference: 88 and 89)

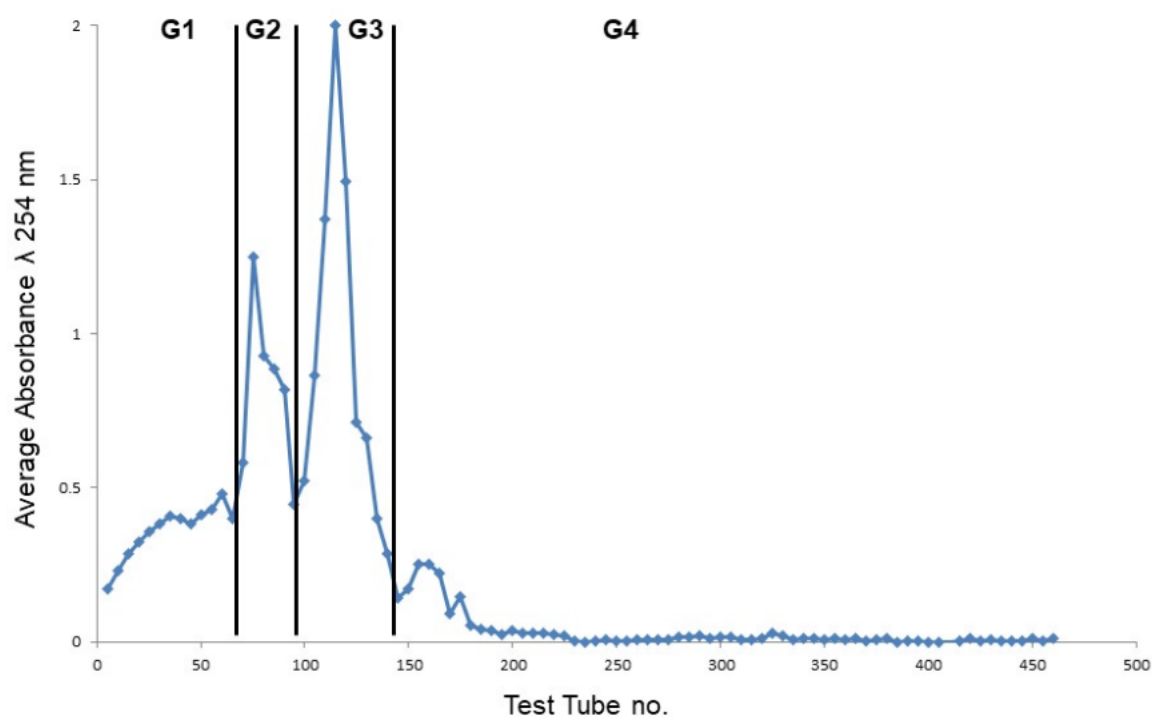

**Figure S8.** Average Absorbance of DSD042<sup>T</sup> GPC fraction showing peaks in G2 and G3 at UV  $\lambda_{\text{max}}$  254 nm.
